# Supplementary material for: NDVI and vegetation volume as predictors of urban bird diversity
Source: Research Square preprint supplement (doi:10.21203/rs.3.rs-5421893/v2), 2024-12-01
Supplement: Supplementary file 1 [file 3d88256627bb0ca522cd83ca.docx]

**Fairbairn et al. Supplement S1**

**Site summary statistics**

| **Table 1** Summary statistics of 86 sites acoustically monitored in Munich, Germany. Week refers to the specific week number of the year when recordings started; days is the total number of days recorded. For vegetation volume and NDVI, only the values in the 100m buffer are shown. Biodiversity metrics include species richness, vocal activity rate (VAR), and Shannon diversity index. | | | | | | | |
| --- | --- | --- | --- | --- | --- | --- | --- |
| site | week | days | vegetation volume | NDVI | richness | VAR | Shannon |
| 1 | 14 | 7 | 1.65 | 0.23 | 28 | 92.29 | 2.61 |
| 2 | 14 | 7 | 2.07 | 0.35 | 29 | 105.86 | 2.44 |
| 3 | 14 | 7 | 1.53 | 0.25 | 20 | 59.43 | 2.43 |
| 5 | 14 | 7 | 0.36 | 0.27 | 39 | 161 | 2.69 |
| 6 | 14 | 7 | 2.49 | 0.3 | 23 | 61.14 | 2.12 |
| 7 | 14 | 7 | 2.02 | 0.39 | 35 | 100.57 | 2.9 |
| 8 | 14 | 7 | 2.92 | 0.45 | 39 | 190.29 | 2.79 |
| 9 | 14 | 6.96 | 1.37 | 0.46 | 42 | 224.62 | 2.9 |
| 11 | 14 | 7 | 4.9 | 0.42 | 27 | 122.71 | 2.13 |
| 12 | 14 | 7 | 3.18 | 0.47 | 37 | 160.57 | 2.62 |
| 13 | 14 | 7 | 2.19 | 0.44 | 32 | 106.71 | 2.44 |
| 14 | 14 | 7 | 1.48 | 0.36 | 40 | 165.57 | 2.78 |
| 16 | 14 | 7 | 11.02 | 0.7 | 38 | 273 | 2.76 |
| 17 | 14 | 7 | 7.93 | 0.61 | 26 | 78.29 | 2.59 |
| 18 | 14 | 5 | 8.11 | 0.59 | 42 | 158 | 2.94 |
| 19 | 14 | 7 | 10.34 | 0.67 | 42 | 193.86 | 2.92 |
| 21 | 14 | 7 | 12.55 | 0.71 | 38 | 271.57 | 2.72 |
| 24 | 14 | 7 | 4.26 | 0.55 | 45 | 272.86 | 2.94 |
| 25 | 29 | 7 | 0.18 | 0.12 | 8 | 25.86 | 1.26 |
| 26 | 27 | 6 | 1.15 | 0.2 | 9 | 24 | 1.06 |
| 27 | 31 | 7 | 1.49 | 0.25 | 9 | 7.14 | 1.72 |
| 28 | 31 | 7 | 1.15 | 0.25 | 23 | 34 | 2.59 |
| 29 | 27 | 7 | 1.04 | 0.28 | 26 | 83.43 | 2.17 |
| 30 | 29 | 7 | 1.9 | 0.27 | 8 | 9.71 | 1.41 |
| 31 | 27 | 7 | 0.73 | 0.23 | 18 | 47 | 1.78 |
| 32 | 29 | 3.83 | 2.25 | 0.35 | 23 | 44.35 | 2.8 |
| 33 | 31 | 7 | 2.28 | 0.53 | 34 | 97 | 2.81 |
| 34 | 31 | 7 | 0.67 | 0.23 | 5 | 2 | 1.55 |
| 35 | 27 | 7 | 0.92 | 0.26 | 28 | 56 | 2.36 |
| 36 | 29 | 7 | 1.07 | 0.63 | 27 | 42.71 | 2.82 |
| 37 | 27 | 7 | 1.89 | 0.5 | 36 | 111.86 | 3.05 |
| 39 | 31 | 7 | 1.06 | 0.58 | 39 | 71.43 | 2.97 |
| 40 | 27 | 7 | 2.01 | 0.27 | 15 | 68.86 | 1.16 |
| 41 | 29 | 6 | 3.47 | 0.34 | 21 | 39 | 2.31 |
| 42 | 31 | 7 | 0.44 | 0.31 | 19 | 20.29 | 2.42 |
| 43 | 31 | 7 | 1.89 | 0.32 | 29 | 47.57 | 3 |
| 44 | 27 | 7 | 2.38 | 0.38 | 29 | 58.57 | 2.83 |
| 45 | 29 | 3.83 | 2.57 | 0.37 | 15 | 44.61 | 1.84 |
| 46 | 27 | 7 | 0.49 | 0.36 | 36 | 133.29 | 2.2 |
| 47 | 29 | 3.83 | 1.35 | 0.34 | 20 | 109.57 | 2.38 |
| 48 | 31 | 5 | 3.07 | 0.42 | 19 | 22.2 | 2.54 |
| 49 | 27 | 7 | 0.87 | 0.32 | 24 | 75.43 | 2.38 |
| 50 | 31 | 7 | 0.29 | 0.43 | 29 | 68 | 2.54 |
| 51 | 29 | 7 | 1.35 | 0.4 | 36 | 121.14 | 2.9 |
| 52 | 29 | 7 | 0.59 | 0.48 | 44 | 111.29 | 2.98 |
| 53 | 31 | 7 | 0.03 | 0.24 | 17 | 34.43 | 1.95 |
| 54 | 27 | 7 | 4.62 | 0.68 | 48 | 272.43 | 2.83 |
| 55 | 29 | 3.83 | 8.57 | 0.51 | 16 | 40.43 | 2.26 |
| 56 | 31 | 7 | 2.75 | 0.3 | 15 | 15.29 | 2.44 |
| 57 | 27 | 7 | 4.16 | 0.41 | 23 | 70.14 | 2.22 |
| 58 | 27 | 7 | 4.67 | 0.48 | 27 | 69.14 | 2.53 |
| 59 | 29 | 3.83 | 4.18 | 0.49 | 28 | 93.13 | 2.52 |
| 60 | 31 | 7 | 3.48 | 0.48 | 26 | 75.71 | 2.71 |
| 62 | 31 | 7 | 2.3 | 0.44 | 32 | 84 | 2.7 |
| 63 | 27 | 7 | 2.92 | 0.58 | 30 | 148 | 2.68 |
| 64 | 31 | 7 | 0.68 | 0.46 | 20 | 33.86 | 2.18 |
| 65 | 27 | 6.83 | 2.71 | 0.59 | 38 | 168.29 | 2.79 |
| 66 | 29 | 7 | 2.1 | 0.45 | 40 | 168.86 | 2.95 |
| 67 | 29 | 6.58 | 6.01 | 0.62 | 32 | 118.48 | 2.81 |
| 68 | 31 | 7 | 0.23 | 0.34 | 7 | 7.14 | 1.49 |
| 70 | 29 | 7 | 6.56 | 0.5 | 17 | 44.14 | 2.15 |
| 71 | 31 | 7 | 9.27 | 0.58 | 20 | 54.57 | 2.53 |
| 72 | 27 | 5 | 6.22 | 0.51 | 34 | 212.4 | 2.42 |
| 73 | 31 | 7 | 2.02 | 0.47 | 27 | 38.14 | 2.91 |
| 74 | 27 | 7 | 3.14 | 0.48 | 33 | 113.86 | 2.39 |
| 75 | 29 | 7 | 3.18 | 0.42 | 30 | 93.71 | 2.8 |
| 76 | 29 | 3.67 | 2.53 | 0.47 | 33 | 118.64 | 2.94 |
| 77 | 29 | 2.58 | 5.35 | 0.59 | 22 | 82.84 | 2.76 |
| 78 | 31 | 7 | 11.09 | 0.64 | 26 | 59.43 | 2.58 |
| 79 | 27 | 7 | 6.09 | 0.59 | 37 | 154.29 | 2.8 |
| 80 | 31 | 7 | 6.71 | 0.63 | 29 | 41.43 | 2.79 |
| 81 | 27 | 7 | 0.53 | 0.4 | 33 | 94.71 | 2.73 |
| 82 | 29 | 3.83 | 4.94 | 0.55 | 10 | 13.04 | 2.03 |
| 83 | 31 | 7 | 2.04 | 0.63 | 35 | 73.29 | 2.79 |
| 86 | 29 | 3.83 | 12.88 | 0.7 | 20 | 78.26 | 2.55 |
| 87 | 31 | 7 | 8.25 | 0.45 | 9 | 5 | 2 |
| 88 | 27 | 7 | 2.93 | 0.32 | 16 | 33.86 | 1.21 |
| 89 | 27 | 7 | 7.64 | 0.67 | 35 | 201.86 | 2.67 |
| 91 | 31 | 7 | 5.89 | 0.56 | 31 | 37.57 | 2.95 |
| 92 | 31 | 6 | 2.73 | 0.46 | 23 | 48.67 | 2.11 |
| 94 | 29 | 3.83 | 9.95 | 0.62 | 27 | 119.22 | 2.49 |
| 95 | 31 | 7 | 10.75 | 0.7 | 23 | 60 | 2.4 |
| 96 | 27 | 7 | 8.85 | 0.6 | 35 | 128.57 | 2.9 |
| 97 | 31 | 7 | 0.93 | 0.47 | 18 | 27.57 | 2.07 |
| 98 | 27 | 7 | 6.81 | 0.69 | 33 | 134.43 | 2.58 |
| 99 | 29 | 6.54 | 8.99 | 0.66 | 21 | 68.03 | 2.29 |

**Correlation of mean NDVI and log mean vegetation volume.**


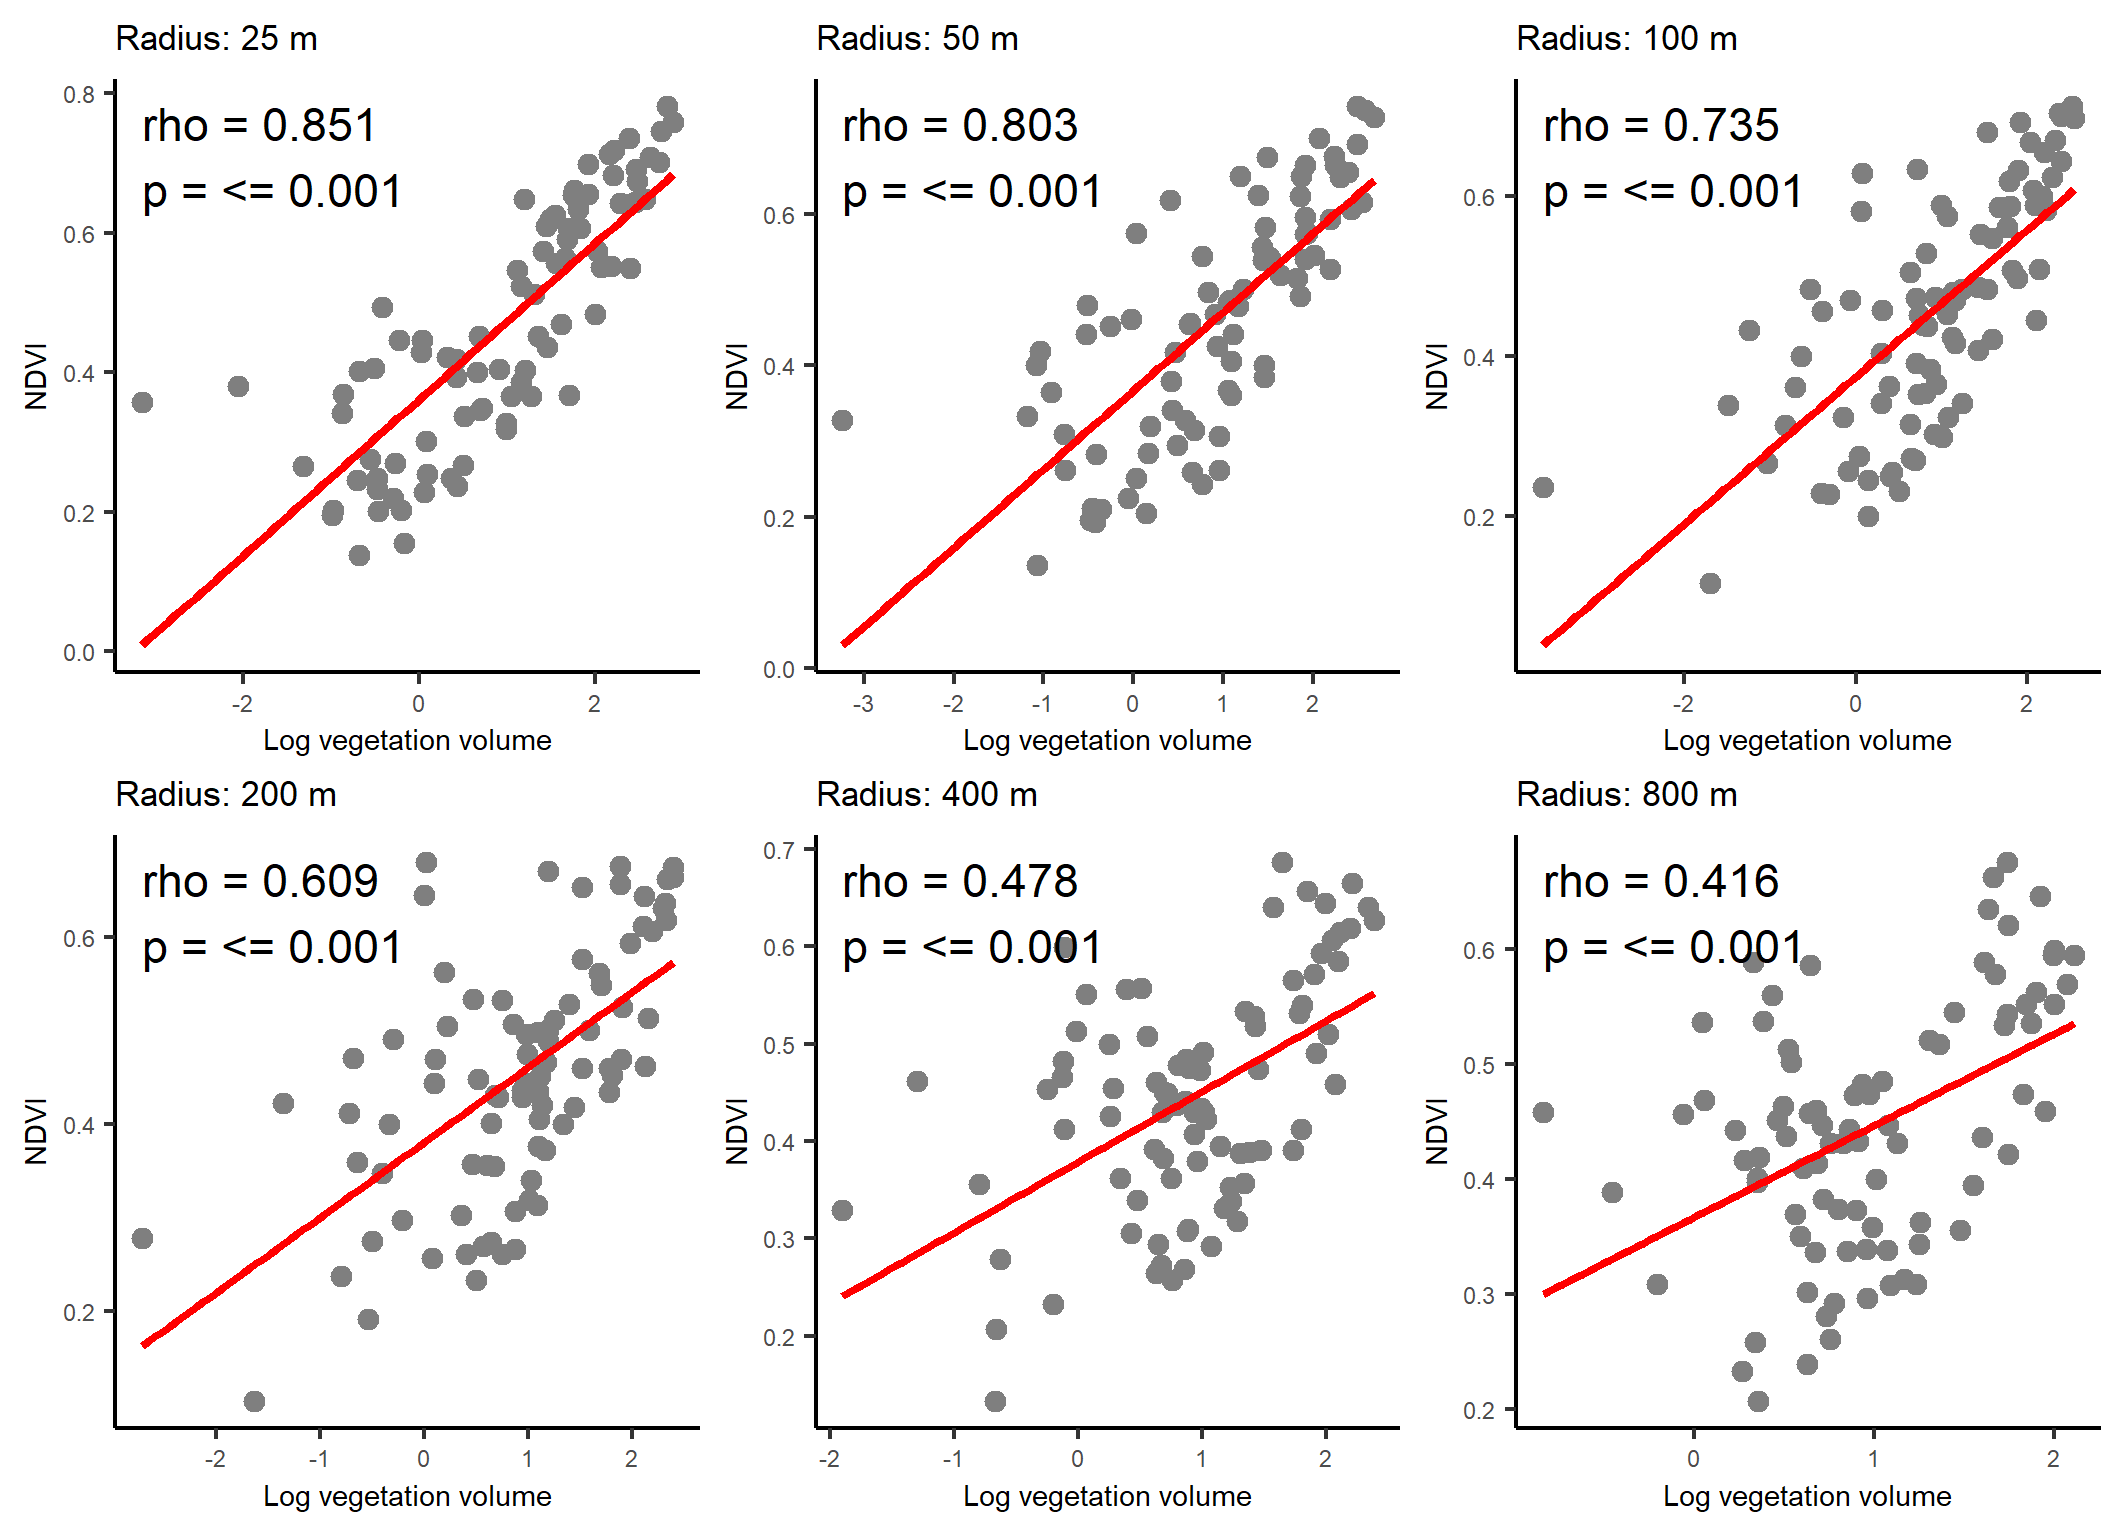


**Fig. 1** Relationship between log-transformed vegetation volume and Normalized Difference Vegetation Index (NDVI) at six different spatial scales (radii: 25m, 50m, 100m, 200m, 400m, and 800m). Red lines indicate linear regression fits. Spearman's rank correlation coefficients (rho) and corresponding p-values are displayed in the top-left corner of each subplot

**Species detected in Munich, Germany from 86 sites**

| **Table 2** Species found via acoustic monitoring and automatic identification with BirdNET on 86 sites in Munich, Germany. N sites is the number of sites the species was detected on. Min, mean, sd, and max vocal activity rate (VAR) are presented. Dominant habitat is also presented. | | | | | | |
| --- | --- | --- | --- | --- | --- | --- |
|  |  | VAR | | | |  |
| scientific name | n sites | min | mean ± sd | max | total | habitat |
| *Accipiter nisus* | 3 | 0.60 | 2.34 ± 1.51 | 3.29 | 7.02 | Forest |
| *Actitis hypoleucos* | 22 | 0.14 | 0.44 ± 0.47 | 2.43 | 9.68 | Wetland |
| *Aegithalos caudatus* | 27 | 0.14 | 0.9 ± 1.16 | 5.43 | 24.4 | Forest |
| *Alauda arvensis* | 3 | 3.86 | 5.94 ± 1.9 | 7.57 | 17.8 | Grassland |
| *Alcedo atthis* | 5 | 0.14 | 0.43 ± 0.23 | 0.71 | 2.16 | Riverine |
| *Anas crecca* | 10 | 0.29 | 0.37 ± 0.12 | 0.57 | 3.69 | Wetland |
| *Anas platyrhynchos* | 9 | 0.29 | 1.06 ± 0.82 | 2.86 | 9.55 | Wetland |
| *Anser anser* | 15 | 0.14 | 1.52 ± 2.03 | 7.71 | 22.8 | Wetland |
| *Anthus trivialis* | 54 | 0.14 | 1.04 ± 1.58 | 11.14 | 56.3 | Woodland |
| *Apus apus* | 59 | 0.14 | 7.04 ± 10.68 | 51.57 | 415 | Human Modified |
| *Ardea cinerea* | 40 | 0.14 | 0.61 ± 0.38 | 1.57 | 24.5 | Wetland |
| *Branta canadensis* | 1 | 0.29 | 0.29 ± NA | 0.29 | 0.29 | Grassland |
| *Buteo buteo* | 24 | 0.29 | 0.92 ± 0.91 | 4.29 | 22.1 | Grassland |
| *Carduelis carduelis* | 71 | 0.26 | 6.83 ± 9.52 | 44.14 | 485 | Woodland |
| *Certhia brachydactyla* | 68 | 0.14 | 5.5 ± 6.82 | 38.14 | 374 | Forest |
| *Certhia familiaris* | 6 | 0.43 | 0.94 ± 0.69 | 2.14 | 5.66 | Forest |
| *Charadrius dubius* | 4 | 0.14 | 0.35 ± 0.24 | 0.57 | 1.41 | Wetland |
| *Chloris chloris* | 65 | 0.14 | 7.19 ± 9.27 | 43.71 | 468 | Woodland |
| *Ciconia ciconia* | 3 | 0.14 | 0.52 ± 0.36 | 0.86 | 1.57 | Grassland |
| *Coccothraustes coccothraustes* | 66 | 0.29 | 2.12 ± 2.16 | 9.13 | 140 | Forest |
| *Columba livia* | 37 | 0.17 | 0.85 ± 1.33 | 7.29 | 31.5 | Human Modified |
| *Columba oenas* | 11 | 0.29 | 1.05 ± 0.98 | 3.29 | 11.5 | Woodland |
| *Columba palumbus* | 64 | 0.14 | 3.06 ± 4 | 24.30 | 196 | Woodland |
| *Corvus corax* | 7 | 0.14 | 0.25 ± 0.06 | 0.29 | 1.77 | Forest |
| *Corvus cornix* | 53 | 0.29 | 4.98 ± 5.29 | 32.00 | 264 | Human Modified |
| *Corvus corone* | 78 | 0.29 | 2.87 ± 2.38 | 11.71 | 224 | Human Modified |
| *Corvus frugilegus* | 65 | 0.29 | 2.89 ± 4.69 | 28.71 | 188 | Grassland |
| *Corvus monedula* | 4 | 0.14 | 1.29 ± 1.91 | 4.14 | 5.14 | Human Modified |
| *Curruca curruca* | 3 | 0.14 | 0.24 ± 0.08 | 0.29 | 0.71 | Shrubland |
| *Cyanistes caeruleus* | 66 | 0.14 | 4.67 ± 7.2 | 38.86 | 308 | Forest |
| *Delichon urbicum* | 23 | 0.14 | 1.78 ± 2.8 | 11.86 | 40.9 | Human Modified |
| *Dendrocopos major* | 74 | 0.29 | 6.61 ± 7.13 | 31.00 | 489 | Woodland |
| *Dendrocoptes medius* | 6 | 0.29 | 0.45 ± 0.28 | 1.00 | 2.72 | Woodland |
| *Dryobates minor* | 9 | 0.14 | 0.37 ± 0.19 | 0.71 | 3.29 | Forest |
| *Dryocopus martius* | 10 | 0.14 | 0.56 ± 0.49 | 1.57 | 5.58 | Forest |
| *Emberiza citrinella* | 8 | 0.29 | 13.43 ± 22 | 56.60 | 107 | Shrubland |
| *Erithacus rubecula* | 61 | 0.29 | 4.45 ± 4.71 | 22.80 | 272 | Forest |
| *Falco tinnunculus* | 30 | 0.14 | 1.56 ± 1.72 | 7.14 | 46.9 | Shrubland |
| *Ficedula hypoleuca* | 22 | 0.29 | 0.68 ± 0.49 | 2.14 | 15 | Forest |
| *Fringilla coelebs* | 39 | 0.14 | 5.52 ± 10.19 | 47.57 | 215 | Forest |
| *Fulica atra* | 29 | 0.29 | 1.41 ± 3.79 | 21.00 | 41 | Wetland |
| *Gallinula chloropus* | 25 | 0.14 | 0.64 ± 0.5 | 2.01 | 15.9 | Wetland |
| *Garrulus glandarius* | 39 | 0.14 | 1.02 ± 0.95 | 4.00 | 39.6 | Forest |
| *Hirundo rustica* | 10 | 0.20 | 1.03 ± 0.88 | 2.57 | 10.3 | Human Modified |
| *Larus michahellis* | 8 | 0.14 | 0.46 ± 0.29 | 1.04 | 3.71 | Human Modified |
| *Lophophanes cristatus* | 15 | 0.17 | 0.72 ± 1 | 3.86 | 10.8 | Woodland |
| *Motacilla alba* | 15 | 0.14 | 2.23 ± 2.94 | 11.29 | 33.4 | Human Modified |
| *Motacilla cinerea* | 27 | 0.14 | 0.64 ± 0.5 | 2.09 | 17.2 | Riverine |
| *Motacilla flava* | 3 | 0.29 | 1 ± 0.71 | 1.71 | 3 | Grassland |
| *Muscicapa striata* | 35 | 0.14 | 1.46 ± 1.33 | 6.43 | 50.9 | Forest |
| *Nycticorax nycticorax* | 15 | 0.29 | 0.94 ± 0.8 | 3.00 | 14.1 | Wetland |
| *Oriolus oriolus* | 3 | 0.57 | 0.62 ± 0.08 | 0.71 | 1.86 | Woodland |
| *Parus major* | 64 | 0.14 | 7.09 ± 10.84 | 36.43 | 454 | Woodland |
| *Passer domesticus* | 11 | 0.14 | 1.74 ± 1.76 | 5.71 | 19.1 | Human Modified |
| *Passer montanus* | 12 | 0.17 | 3.46 ± 5.01 | 16.71 | 41.5 | Woodland |
| *Periparus ater* | 13 | 0.26 | 4.92 ± 7.28 | 21.86 | 64 | Forest |
| *Phasianus colchicus* | 20 | 0.29 | 1.43 ± 3.04 | 13.94 | 28.6 | Human Modified |
| *Phoenicurus ochruros* | 36 | 0.14 | 2.8 ± 3.89 | 18.86 | 101 | Human Modified |
| *Phoenicurus phoenicurus* | 17 | 0.14 | 0.97 ± 1.19 | 4.14 | 16.5 | Woodland |
| *Phylloscopus collybita* | 59 | 0.17 | 8.78 ± 11.76 | 46.00 | 518 | Forest |
| *Pica pica* | 46 | 0.14 | 3.35 ± 4.03 | 14.73 | 154 | Human Modified |
| *Picus viridis* | 78 | 0.14 | 4.11 ± 4.04 | 20.86 | 321 | Forest |
| *Poecile palustris* | 46 | 0.14 | 1.62 ± 1.67 | 6.57 | 74.4 | Forest |
| *Prunella modularis* | 3 | 0.57 | 1.1 ± 0.58 | 1.71 | 3.31 | Forest |
| *Pyrrhula pyrrhula* | 12 | 0.29 | 1.52 ± 2.13 | 7.29 | 18.3 | Forest |
| *Rallus aquaticus* | 6 | 0.20 | 0.69 ± 0.93 | 2.57 | 4.15 | Wetland |
| *Regulus ignicapilla* | 18 | 0.29 | 0.96 ± 1.1 | 4.71 | 17.3 | Forest |
| *Regulus regulus* | 6 | 0.29 | 2.64 ± 3.48 | 9.43 | 15.8 | Forest |
| *Serinus serinus* | 9 | 0.14 | 1.59 ± 3.91 | 12.00 | 14.3 | Forest |
| *Sitta europaea* | 47 | 0.14 | 5.41 ± 9.91 | 47.00 | 254 | Forest |
| *Spinus spinus* | 15 | 0.29 | 0.52 ± 0.55 | 2.43 | 7.86 | Forest |
| *Streptopelia decaocto* | 29 | 0.29 | 2.09 ± 3.79 | 18.71 | 60.7 | Human Modified |
| *Strix aluco* | 39 | 0.43 | 4.44 ± 3.2 | 13.00 | 173 | Forest |
| *Sturnus vulgaris* | 2 | 0.29 | 0.43 ± 0.2 | 0.57 | 0.86 | Human Modified |
| *Sylvia atricapilla* | 46 | 0.14 | 5.47 ± 10.3 | 44.20 | 252 | Woodland |
| *Sylvia borin* | 3 | 0.40 | 0.66 ± 0.42 | 1.14 | 1.98 | Woodland |
| *Tachybaptus ruficollis* | 1 | 2.86 | 2.86 ± NA | 2.86 | 2.86 | Wetland |
| *Tringa nebularia* | 3 | 0.14 | 0.37 ± 0.21 | 0.57 | 1.1 | Wetland |
| *Tringa ochropus* | 33 | 0.14 | 0.53 ± 0.42 | 2.14 | 17.3 | Wetland |
| *Troglodytes troglodytes* | 20 | 0.14 | 3.6 ± 3.57 | 13.29 | 72 | Forest |
| *Turdus merula* | 64 | 0.14 | 4.81 ± 6.92 | 26.14 | 308 | Forest |
| *Turdus philomelos* | 62 | 0.29 | 0.87 ± 0.79 | 5.14 | 54.1 | Forest |
| *Turdus pilaris* | 32 | 0.14 | 1.11 ± 1.64 | 8.14 | 35.4 | Forest |
| *Turdus viscivorus* | 12 | 0.29 | 2.56 ± 7.56 | 26.57 | 30.7 | Forest |
| *Upupa epops* | 9 | 0.29 | 0.49 ± 0.2 | 0.86 | 4.43 | Grassland |
| *Vanellus vanellus* | 5 | 0.40 | 1.88 ± 2.35 | 6.00 | 9.4 | Wetland |

**ANOVA results from linear models for radius selection analyses**

| **Table 3** ANOVA results from linear models for three diversity metrics (vocal activity rate (VAR), species richness, and Shannon diversity) and log mean vegetation volume and mean NDVI at six distance radii (25m, 50m, 100m, 200m, 400m, 800m) from 86 observation points in Munich, Germany. | | | | |
| --- | --- | --- | --- | --- |
| **radius** | **diversity metric** | **vegetation volume** | **covariates** | **adjusted R2** |
| 25 | richness | F1,82=7.34; p=0.008 | week F1,82=26.59; p≤0.001 distance F1,82=23.59; p≤0.001 | 0.39 |
|  | VAR | F1,82=14.1; p≤0.001 | week F1,82=51.44; p≤0.001 distance F1,82=8.18; p=0.005 | 0.45 |
|  | Shannon | F1,82=10.58; p=0.002 | week F1,82=4.18; p=0.044 distance F1,82=13.09; p≤0.001 | 0.23 |
| 50 | richness | F1,82=7.98; p=0.006 | week F1,82=26.78; p≤0.001 distance F1,82=23.76; p≤0.001 | 0.4 |
|  | VAR | F1,82=14.64; p≤0.001 | week F1,82=51.73; p≤0.001 distance F1,82=8.22; p=0.005 | 0.46 |
|  | Shannon | F1,82=15.22; p≤0.001 | week F1,82=4.39; p=0.039 distance F1,82=13.75; p≤0.001 | 0.26 |
| 100 | richness | F1,82=8.90; p=0.004 | week F1,82=27.05; p≤0.001 distance F1,82=24; p≤0.001 | 0.4 |
|  | VAR | F1,82=13.02; p≤0.001 | week F1,82=50.86; p≤0.001 distance F1,82=8.09; p=0.006 | 0.45 |
|  | Shannon | F1,82=16.28; p≤0.001 | week F1,82= 4.43; p=0.038 distance F1,82=13.9; p≤0.001 | 0.27 |
| 200 | richness | F1,82=5.39; p=0.02 | week F1,82=26.01; p≤0.001 distance F1,82=23.08; p≤0.001 | 0.38 |
|  | VAR | F1,82=8.4; p=0.005 | week F1,82=48.39; p≤0.001 distance F1,82=7.69; p=0.007 | 0.42 |
|  | Shannon | F1,82=9.36; p=0.003 | week F1,82=4.12; p=0.046 distance F1,82=12.92; p=0.003 | 0.22 |
| 400 | richness | F1,82=5.6; p=0.02 | week F1,82=26.07; p≤0.001 distance F1,82=23.13; p≤0.001 | 0.38 |
|  | VAR | F1,82=9.14; p=0.003 | week F1,82=48.78; p≤0.001 distance F1,82=7.76; p=0.007 | 0.42 |
|  | Shannon | F1,82=6.1; p=0.016 | week F1,82=3.97; p=0.05 distance F1,82=12.46; p≤0.001 | 0.19 |
| 800 | richness | F1,82=5.72; p=0.02 | week F1,82=26.17; p≤0.001 distance F1,82=23.16; p≤0.001 | 0.38 |
|  | VAR | F1,82=7.53; p=0.007 | week F1,82=47.92; p≤0.001 distance F1,82=7.62; p=0.007 | 0.41 |
|  | Shannon | F1,82=4.01; p=0.048 | week F1,82=3.88; p=0.052 distance F1,82=12.17; p≤0.001 | 0.17 |
|  |  |  |  |  |
| **radius** | **diversity metric** | NDVI | covariates | **adjusted R2** |
| 25 | richness | F1,82=8.31; p=0.005 | week F1,82=26.87; p≤0.001 distance F1,82=23.85; p≤0.001 | 0.4 |
|  | VAR | F1,82=17.06; p≤0.001 | week F1,82=53.02; p≤0.001 distance F1,82=8.43; p=0.005 | 0.47 |
|  | Shannon | F1,82=14.33; p≤0.001 | week F1,82=4.35; p=0.04 distance F1,82=13.62; p≤0.001 | 0.26 |
| 50 | richness | F1,82=15.35; p≤0.001 | week F1,82=28.97; p≤0.001 distance F1,82=25.71; p≤0.001 | 0.44 |
|  | VAR | F1,82=24.69; p≤0.001 | week F1,82=57.11; p≤0.001 distance F1,82=9.08; p=0.003 | 0.51 |
|  | Shannon | F1,82=25.13; p≤0.001 | week F1,82=4.83; p=0.031 distance F1,82=15.15; p≤0.001 | 0.33 |
| 100 | richness | F1,82=23.16; p≤0.001 | week F1,82=31.29; p≤0.001 distance F1,82=27.77; p≤0.001 | 0.48 |
|  | VAR | F1,82=30.8; p≤0.001 | week F1,82=60.38; p≤0.001 distance F1,82=9.6; p=0.003 | 0.53 |
|  | Shannon | F1,82=28.76; p≤0.001 | week F1,82=5; p=0.028 distance F1,82=15.67; p≤0.001 | 0.35 |
| 200 | richness | F1,82=19.77; p≤0.001 | week F1,82=30.29; p≤0.001 distance F1,82=26.87; p≤0.001 | 0.47 |
|  | VAR | F1,82=20.05; p≤0.001 | week F1,82=54.62; p≤0.001 distance F1,82=8.69; p=0.004 | 0.49 |
|  | Shannon | F1,82=20.69; p≤0.001 | week F1,82=4.63; p≤0.034 distance F1,82=14.52; p≤0.001 | 0.3 |
| 400 | richness | F1,82=14.87; p≤0.001 | week F1,82=28.8; p≤0.001 distance F1,82=25.56; p≤0.001 | 0.44 |
|  | VAR | F1,82=9.75; p=0.002 | week F1,82=49.11; p≤0.001 distance F1,82=7.81; p=0.006 | 0.43 |
|  | Shannon | F1,82=12.45; p=0.001 | week F1,82=4.26; p=0.042 distance F1,82=13.36; p≤0.001 | 0.24 |
| 800 | richness | F1,82=13.51; p≤0.001 | week F1,82=28.42; p≤0.001 distance F1,82=13.19; p≤0.001 | 0.43 |
|  | VAR | F1,82=5.43; p=0.022 | week F1,82=46.8; p≤0.001 distance F1,82=7.44; p=0.008 | 0.4 |
|  | Shannon | F1,82=10.88; p=0.001 | week F1,82=4.19; p=0.044 distance F1,82=13.14; p≤0.001 | 0.23 |

**Predictive modelling**

| **Table 4:** ANOVA results from a linear mixed effects models for predicting three diversity metrics based on NDVI and the covariates of recording week and distance to the city centre. | | | |
| --- | --- | --- | --- |
| **model** | **variable** | **F and p value** | **adjusted r-squared** | |
| richness | week | F1,65=22.81; p≤0.001 | 0.49 | |
|  | distance | F1,65=21.70; p≤0.001 |  | |
|  | NDVI | F1,65=23.74; p≤0.001 |  | |
| VAR | week | F1,65=48.53; p≤0.001 | 0.54 | |
|  | distance | F1,65=5.14; p=0.003 |  | |
|  | NDVI | F1,65=29.23; p≤0.001 |  | |
| Shannon | week | F1,65=3.84; p=0.054 | 0.37 | |
|  | distance | F1,65=12.77; p≤0.001 |  | |
|  | NDVI | F1,65=25.52; p≤0.001 |  | |


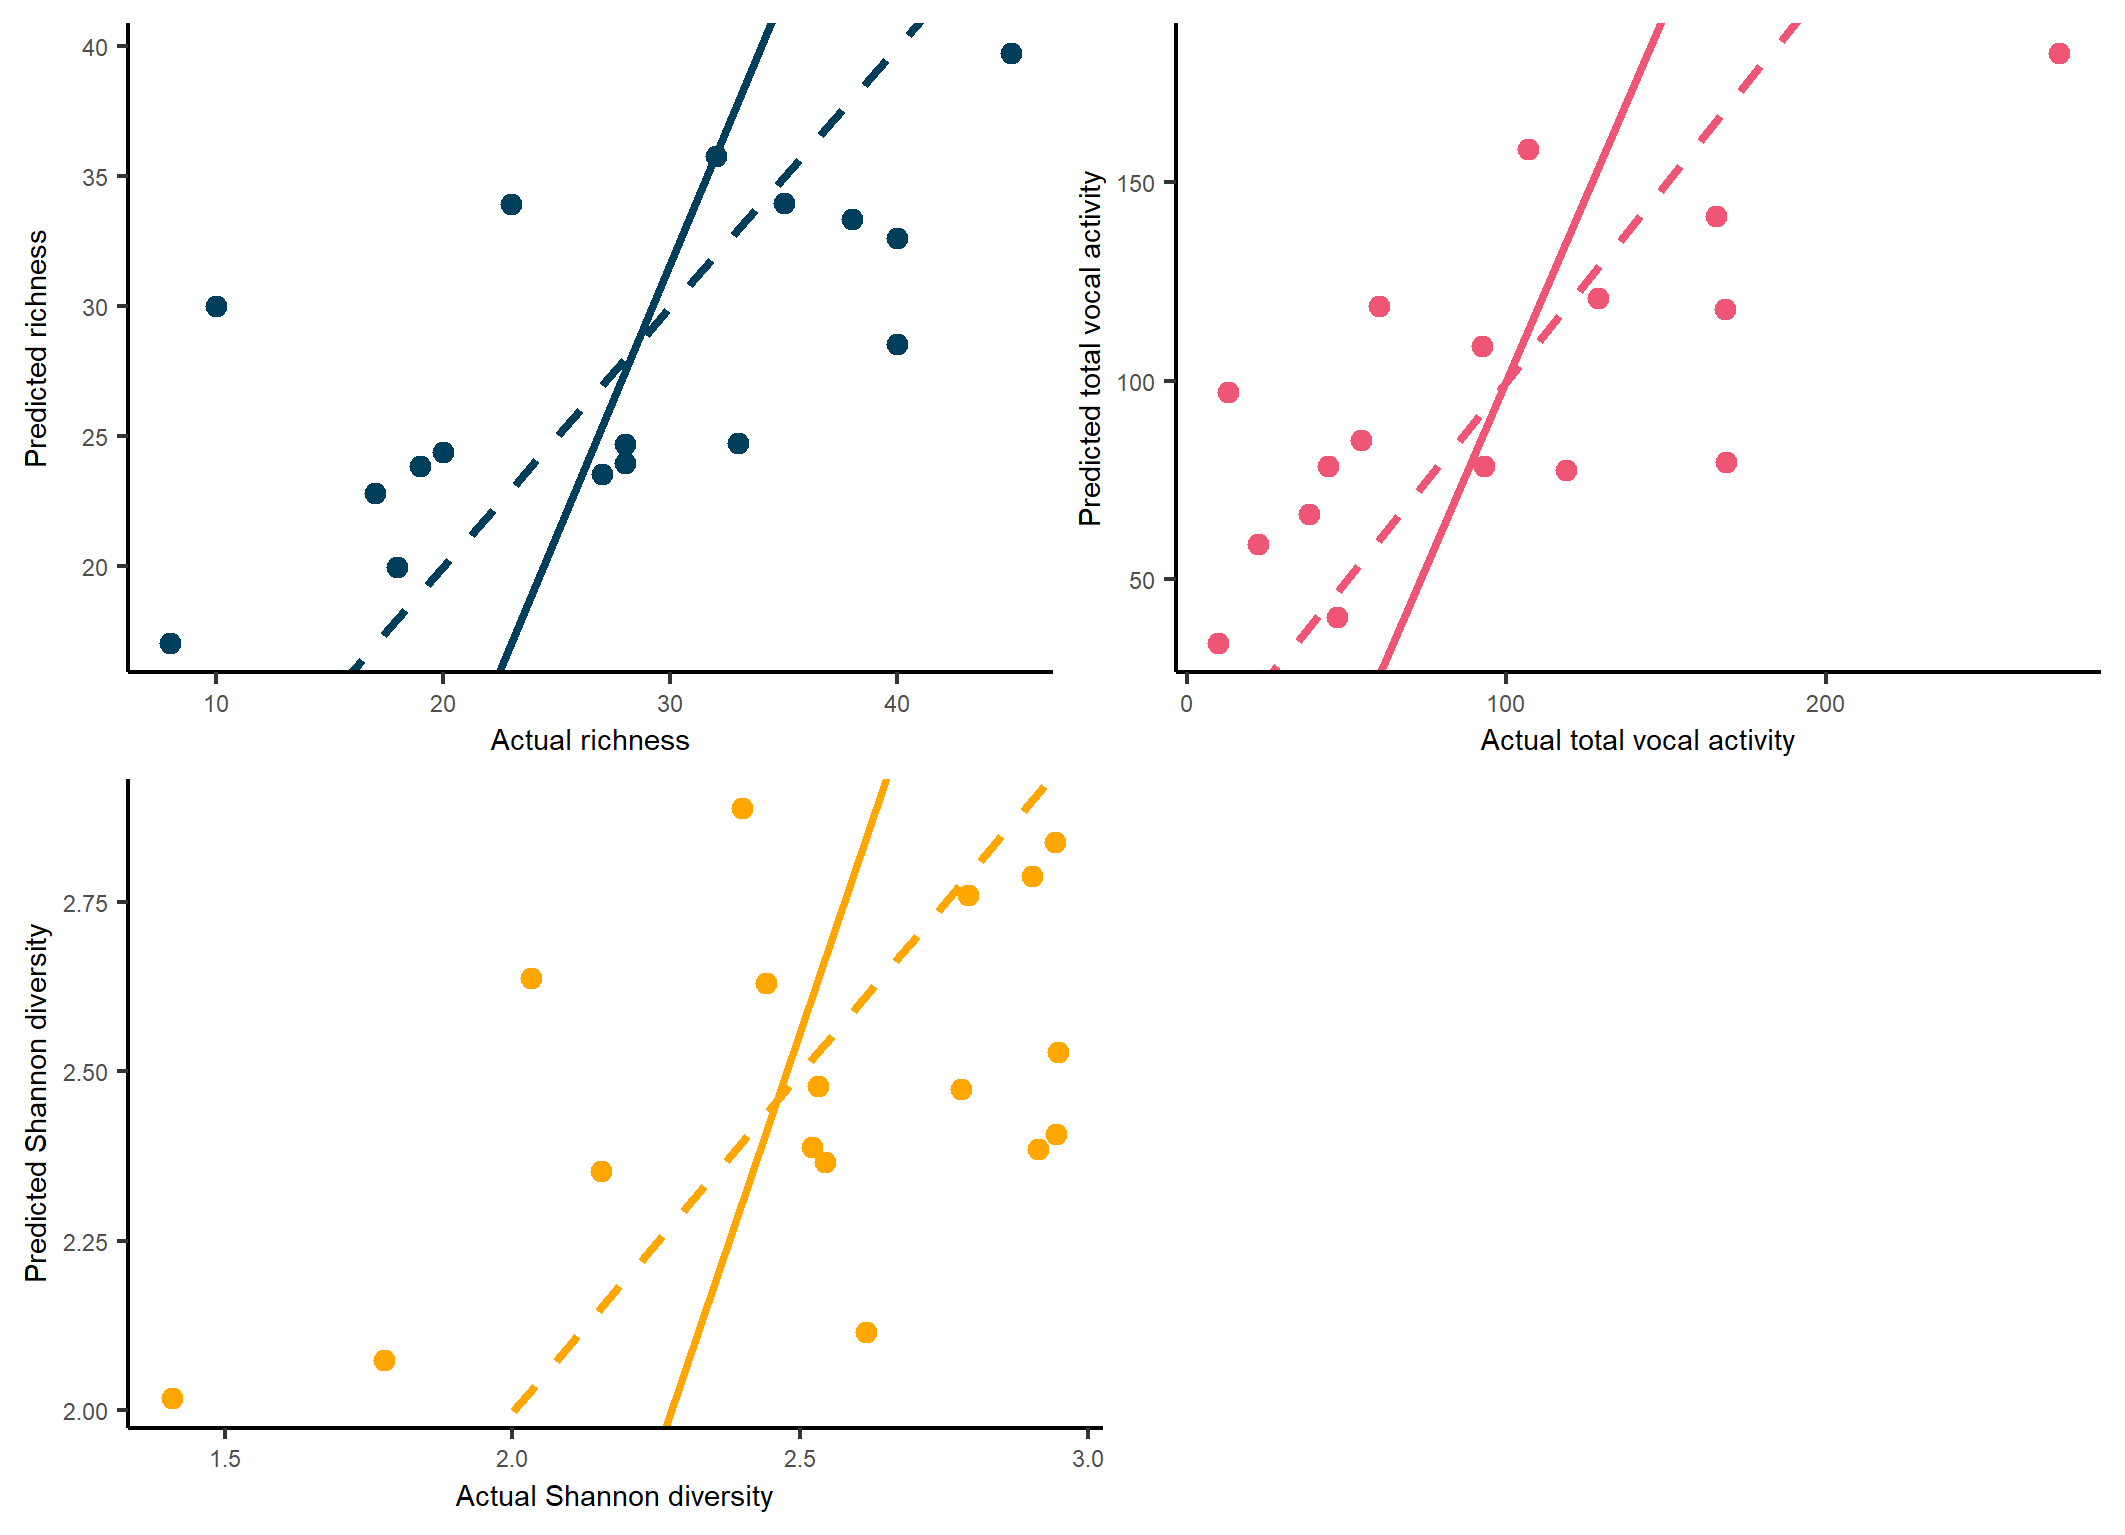


**Fig. 2** Predicted versus actual plots for models predicting four bird diversity metrics across the city of Munich, Germany. The solid lines represent the Standardized (reduced) major axis model II linear regression, and the dashed lines represent the perfect correlation of 45 degrees with an intercept of 0 and slope of 1

| **Table 5:** Reduced major axis regression for actual vs predicted results of predictive models for 17 predictions. R is the Pearson correlation coefficient. Two and one-tailed parametric p-values. | | | | | |
| --- | --- | --- | --- | --- | --- |
| **Variable** | **r** | **r²** | **2-tailed p-value** | **1-tailed p-value** |
| richness | 0.68 | 0.46 | 0.002 | 0.001 | |
| VAR | 0.73 | 0.53 | 0.001 | 0.000 | |
| Shannon diversity | 0.53 | 0.28 | 0.028 | 0.014 | |
